# Supplementary material for: Association of Ankle-Brachial Indices With Limb Revascularization or Amputation in Patients With Peripheral Artery Disease
Source: PubMed Central journal article supplement (PMC6324363; doi:10.1001/jamanetworkopen.2018.5547), 2018-12-07
Supplement: jamanetwopen-1-e185547-s001.pdf [file jamanetwopen-1-e185547-s001.pdf]

## Supplementary Online Content

Moussa Pacha H, Mallipeddi VP, Afzal N, et al. Association of ankle-brachial indices with limb revascularization or amputation in patients with peripheral artery disease. *JAMA Netw Open*. 2018;1(8):e185547. doi:10.1001/jamanetworkopen.2018.5547

**eTable 1.** International Classification of Diseases, 9th Revision, Clinical Modification and Current Procedural Terminology-4 Codes for Revascularization

**eTable 2.** International Classification of Diseases, 9th Revision, Clinical Modification and Current Procedural Terminology-4 Codes for Amputation

**eFigure 1.** Event Rates of Limb Revascularization by CLI Status

**eFigure 2.** Event Rates of Myocardial Infarction, Stroke, Death and Combined End-Point by ABI Group

This supplementary material has been provided by the authors to give readers additional information about their work.

**eTable 1. International Classification of Diseases, 9<sup>th</sup> Revision, Clinical Modification and Current Procedural Terminology-4 codes for Revascularization.**

| Code  | Code Type | Description                                                                                           |
|-------|-----------|-------------------------------------------------------------------------------------------------------|
| 38.08 | ICD-9     | Incision of vessel; lower limb arteries                                                               |
| 38.18 | ICD-9     | Endarterectomy; lower limb arteries                                                                   |
| 38.38 | ICD-9     | Resection of vessel with anastomosis; lower limb arteries                                             |
| 38.48 | ICD-9     | Resection of vessel with replacement; lower limb arteries                                             |
| 39.25 | ICD-9     | Aorto-iliac-femoral bypass                                                                            |
| 35226 | CPT-4     | Repair blood vessel, direct; lower extremity                                                          |
| 35256 | CPT-4     | Repair blood vessel, with vein graft; lower extremity                                                 |
| 35286 | CPT-4     | Repair blood vessel, with graft other than vein; lower extremity                                      |
| 35302 | CPT-4     | Thromboendarterectomy, including patch graft, if performed; superficial femoral artery                |
| 35303 | CPT-4     | Thromboendarterectomy, including patch graft, if performed; popliteal artery                          |
| 35304 | CPT-4     | Thromboendarterectomy, including patch graft, if performed; tibioperoneal trunk artery                |
| 35305 | CPT-4     | Thromboendarterectomy, including patch graft, if performed; tibial or peroneal artery, initial vessel |
| 35306 | CPT-4     | Thromboendarterectomy, including patch graft, if performed; each additional tibial or peroneal artery |
| 35351 | CPT-4     | Thromboendarterectomy, including patch graft, if performed; iliac                                     |
| 35355 | CPT-4     | Thromboendarterectomy, including patch graft, if performed; iliofemoral                               |
| 35361 | CPT-4     | Thromboendarterectomy, including patch graft, if performed; combined aortoiliac                       |
| 35363 | CPT-4     | Thromboendarterectomy, including patch graft, if performed; combined aortiliofemoral                  |
| 35371 | CPT-4     | Thromboendarterectomy, including patch graft, if performed; common femoral                            |
| 35372 | CPT-4     | Thromboendarterectomy, including patch graft, if performed; deep (profunda) femoral                   |
| 35381 | CPT-4     | Thromboendarterectomy, with or without patch graft; femoral and/or popliteal, and/or tibioperoneal    |
| 35454 | CPT-4     | Transluminal balloon angioplasty, open; iliac                                                         |
| 35456 | CPT-4     | Transluminal balloon angioplasty, open; femoral-popliteal                                             |
| 35459 | CPT-4     | Transluminal balloon angioplasty, open; tibioperoneal trunk and branches                              |
| 35470 | CPT-4     | Transluminal balloon angioplasty, percutaneous; tibioperoneal trunk or branches, each vessel          |
| 35473 | CPT-4     | Transluminal balloon angioplasty, percutaneous; iliac                                                 |
| 35474 | CPT-4     | Transluminal balloon angioplasty, percutaneous; femoral-popliteal                                     |
| 35482 | CPT-4     | Transluminal peripheral atherectomy, open; iliac                                                      |
| 35483 | CPT-4     | Transluminal peripheral atherectomy, open; femoral-popliteal                                          |
| 35485 | CPT-4     | Transluminal peripheral atherectomy, open; tibioperoneal trunk and branches                           |
| 35491 | CPT-4     | Transluminal peripheral atherectomy, percutaneous; aortic                                             |
| 35492 | CPT-4     | Transluminal peripheral atherectomy, percutaneous; iliac                                              |

|       |       |                                                                                                                                                                                 |
|-------|-------|---------------------------------------------------------------------------------------------------------------------------------------------------------------------------------|
| 35493 | CPT-4 | Transluminal peripheral atherectomy, percutaneous; femoral-popliteal                                                                                                            |
| 35495 | CPT-4 | Transluminal peripheral atherectomy, percutaneous; tibioperoneal trunk and branches                                                                                             |
| 35521 | CPT-4 | Bypass graft, with vein; axillary-femoral                                                                                                                                       |
| 35533 | CPT-4 | Bypass graft, with vein; axillary-femoral-femoral                                                                                                                               |
| 35537 | CPT-4 | Bypass graft, with vein; aortoiliac                                                                                                                                             |
| 35538 | CPT-4 | Bypass graft, with vein; aortobi-iliac                                                                                                                                          |
| 35539 | CPT-4 | Bypass graft, with vein; aortofemoral                                                                                                                                           |
| 35540 | CPT-4 | Bypass graft, with vein; aortobifemoral                                                                                                                                         |
| 35541 | CPT-4 | Bypass graft, with vein; aortoiliac or bi-iliac                                                                                                                                 |
| 35546 | CPT-4 | Bypass graft, with vein; aortofemoral or bifemoral                                                                                                                              |
| 35548 | CPT-4 | Bypass graft, with vein; aortoiliofemoral, unilateral                                                                                                                           |
| 35549 | CPT-4 | Bypass graft, with vein; aortoiliofemoral, bilateral                                                                                                                            |
| 35551 | CPT-4 | Bypass graft, with vein; aortofemoral-popliteal                                                                                                                                 |
| 35556 | CPT-4 | Bypass graft, with vein; femoral-popliteal                                                                                                                                      |
| 35558 | CPT-4 | Bypass graft, with vein; femoral-femoral                                                                                                                                        |
| 35563 | CPT-4 | Bypass graft, with vein; ilioiliac                                                                                                                                              |
| 35565 | CPT-4 | Bypass graft, with vein; iliofemoral                                                                                                                                            |
| 35566 | CPT-4 | Bypass graft, with vein; femoral-anterior tibial, posterior tibial, peroneal artery or other distal vessels                                                                     |
| 35571 | CPT-4 | Bypass graft, with vein; popliteal-tibial, -peroneal artery or other distal vessels                                                                                             |
| 35582 | CPT-4 | In-situ vein bypass; aortofemoral-popliteal (only femoral-popliteal portion in-situ)                                                                                            |
| 35583 | CPT-4 | In-situ vein bypass; femoral-popliteal                                                                                                                                          |
| 35585 | CPT-4 | In-situ vein bypass; femoral-anterior tibial, posterior tibial, or peroneal artery                                                                                              |
| 35587 | CPT-4 | In-situ vein bypass; popliteal-tibial, peroneal                                                                                                                                 |
| 35621 | CPT-4 | Bypass graft, with other than vein; axillary-femoral                                                                                                                            |
| 35623 | CPT-4 | Bypass graft, with other than vein; axillary-popliteal or -tibial                                                                                                               |
| 35637 | CPT-4 | Bypass graft, with other than vein; aortoiliac                                                                                                                                  |
| 35638 | CPT-4 | Bypass graft, with other than vein; aortobi-iliac                                                                                                                               |
| 35641 | CPT-4 | Bypass graft, with other than vein; aortoiliac or bi-iliac                                                                                                                      |
| 35646 | CPT-4 | Bypass graft, with other than vein; aortobifemoral                                                                                                                              |
| 35647 | CPT-4 | Bypass graft, with other than vein; aortofemoral                                                                                                                                |
| 35651 | CPT-4 | Bypass graft, with other than vein; aortofemoral-popliteal                                                                                                                      |
| 35654 | CPT-4 | Bypass graft, with other than vein; axillary-femoral-femoral                                                                                                                    |
| 35656 | CPT-4 | Bypass graft, with other than vein; femoral-popliteal                                                                                                                           |
| 35661 | CPT-4 | Bypass graft, with other than vein; femoral-femoral                                                                                                                             |
| 35663 | CPT-4 | Bypass graft, with other than vein; ilioiliac                                                                                                                                   |
| 35665 | CPT-4 | Bypass graft, with other than vein; iliofemoral                                                                                                                                 |
| 35666 | CPT-4 | Bypass graft, with other than vein; femoral-popliteal                                                                                                                           |
| 35671 | CPT-4 | Bypass graft, with other than vein; popliteal-tibial or -peroneal artery                                                                                                        |
| 35700 | CPT-4 | Reoperation, femoral-popliteal or femoral (popliteal)-anterior tibial, posterior tibial, peroneal artery, or other distal vessels, more than one month after original operation |
| 35721 | CPT-4 | Exploration (not followed by surgical repair), with or without lysis of artery; femoral artery                                                                                  |

|       |       |                                                                                                                                                                                                                                                                                                                                                                        |
|-------|-------|------------------------------------------------------------------------------------------------------------------------------------------------------------------------------------------------------------------------------------------------------------------------------------------------------------------------------------------------------------------------|
| 35741 | CPT-4 | Exploration (not followed by surgical repair), with or without lysis of artery; popliteal artery                                                                                                                                                                                                                                                                       |
| 35876 | CPT-4 | Thrombectomy of arterial or venous graft (other than hemodialysis graft or fistula); with revision of arterial or venous graft                                                                                                                                                                                                                                         |
| 35879 | CPT-4 | Revision, lower extremity arterial bypass, without thrombectomy, open; with vein patch                                                                                                                                                                                                                                                                                 |
| 35881 | CPT-4 | Revision, lower extremity arterial bypass, without thrombectomy, open; with segmental vein interposition                                                                                                                                                                                                                                                               |
| 35883 | CPT-4 | Revision, femoral anastomosis of synthetic arterial bypass graft in groin, open; with nonautogenous patch graft (e.g. Dacron, ePTFE, bovine pericardium)                                                                                                                                                                                                               |
| 35884 | CPT-4 | Revision, femoral anastomosis of synthetic arterial bypass graft in groin, open; with autogenous patch graft                                                                                                                                                                                                                                                           |
| 37184 | CPT-4 | Primary percutaneous transluminal mechanical thrombectomy, noncoronary, arterial or arterial bypass graft, including fluoroscopic guidance and intraprocedural pharmacological thrombolytic injection(s); initial vessel                                                                                                                                               |
| 37185 | CPT-4 | Primary percutaneous transluminal mechanical thrombectomy, noncoronary, arterial or arterial bypass graft, including fluoroscopic guidance and intraprocedural pharmacological thrombolytic injection(s); second and all subsequent vessel(s) within the same vascular family                                                                                          |
| 37186 | CPT-4 | Secondary percutaneous transluminal thrombectomy (e.g. nonprimary mechanical, snare basket, suction technique), noncoronary, arterial or arterial bypass graft, including fluoroscopic guidance and intraprocedural pharmacological thrombolytic injections, provided in conjunction with another percutaneous intervention other than primary mechanical thrombectomy |
| 37205 | CPT-4 | Transcatheter placement of an intravascular stent(s) (except coronary, carotid, and cerebral vessel), percutaneous; initial vessel                                                                                                                                                                                                                                     |
| 37206 | CPT-4 | Transcatheter placement of an intravascular stent(s) (except coronary, carotid, and cerebral vessel), percutaneous; each additional vessel                                                                                                                                                                                                                             |
| 37207 | CPT-4 | Transcatheter placement of an intravascular stent(s) (except coronary, carotid, and cerebral vessel), open; initial vessel                                                                                                                                                                                                                                             |
| 37208 | CPT-4 | Transcatheter placement of an intravascular stent(s) (except coronary, carotid, and cerebral vessel), open; each additional vessel                                                                                                                                                                                                                                     |

Legend: CPT-4= Current procedural Terminology-4; ICD-9= International Classification of Diseases, 9th Revision

**eTable 2. International Classification of Diseases, 9<sup>th</sup> Revision, Clinical Modification and Current Procedural Terminology-4 codes for Amputation.**

| Code  | Code Type | Description                                                                                                                                 |
|-------|-----------|---------------------------------------------------------------------------------------------------------------------------------------------|
| 84.1x | ICD-9     | Amputation of lower limb                                                                                                                    |
| 84.91 | ICD-9     | Amputation, not otherwise specified                                                                                                         |
| 27295 | CPT-4     | Disarticulation of hip                                                                                                                      |
| 27590 | CPT-4     | Amputation, thigh, through femur, any level                                                                                                 |
| 27591 | CPT-4     | Amputation, thigh, through femur, any level; immediate fitting technique including first cast                                               |
| 27592 | CPT-4     | Amputation, thigh, through femur, any level; open, circular (guillotine)                                                                    |
| 27598 | CPT-4     | Disarticulation at knee                                                                                                                     |
| 27880 | CPT-4     | Amputation, leg, through tibia and fibula                                                                                                   |
| 27881 | CPT-4     | Amputation, leg, through tibia and fibula; with immediate fitting technique including application of first cast                             |
| 27882 | CPT-4     | Amputation, leg, through tibia and fibula; open, circular (guillotine)                                                                      |
| 27888 | CPT-4     | Amputation, ankle, through malleoli of tibia and fibula (e.g. Syme, Pirogoff type procedures), with plastic closure and resection of nerves |
| 27889 | CPT-4     | Ankle disarticulation                                                                                                                       |
| 28800 | CPT-4     | Amputation, foot; midtarsal (e.g., Chopart type procedure)                                                                                  |
| 28805 | CPT-4     | Amputation, foot; transmetatarsal                                                                                                           |

Legend: CPT-4= Current procedural Terminology-4; ICD-9= International Classification of Diseases, 9th Revision

**eFigure 1. Event Rates of Limb Revascularization by CLI Status**

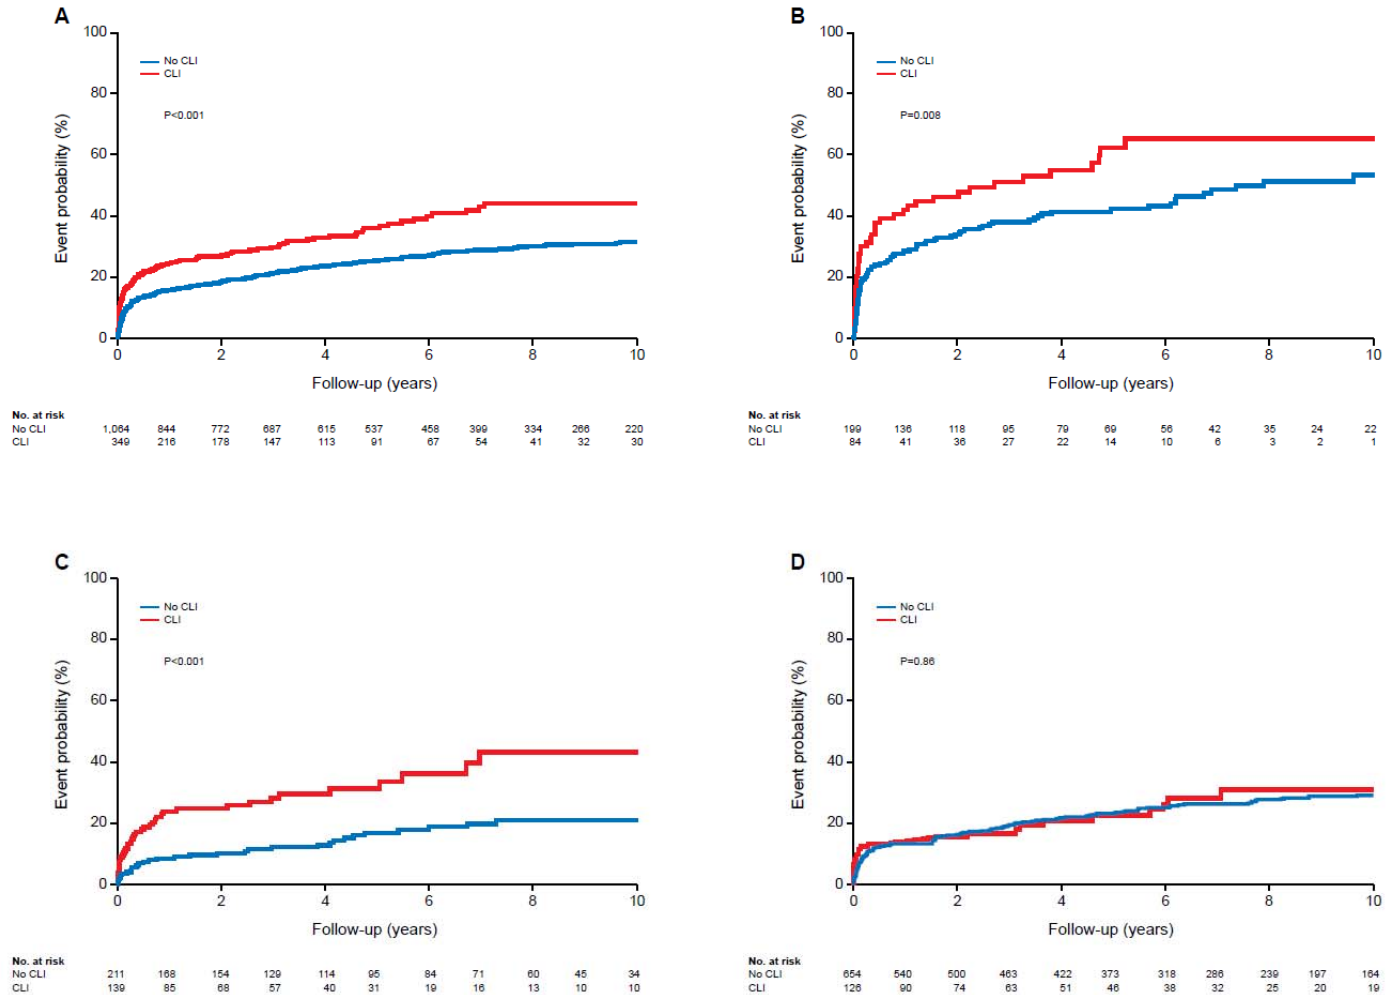

Legend: Patients with CLI were more likely to be revascularized at follow up in the overall cohort (panel A), in the subgroup of patients with severe PAD (panel B); and in the subgroup of patients with PCA (panel C). However, in the reference subgroup (other ABI values) the event-rates were similar for patients with or without CLI (panel D). Log-rank p-values shown. CLI = Critical Limb Ischemia, No = Number

eFigure 2 – Title: Event-rates of Myocardial Infarction, Stroke, Death and Combined End-Point by ABI group.

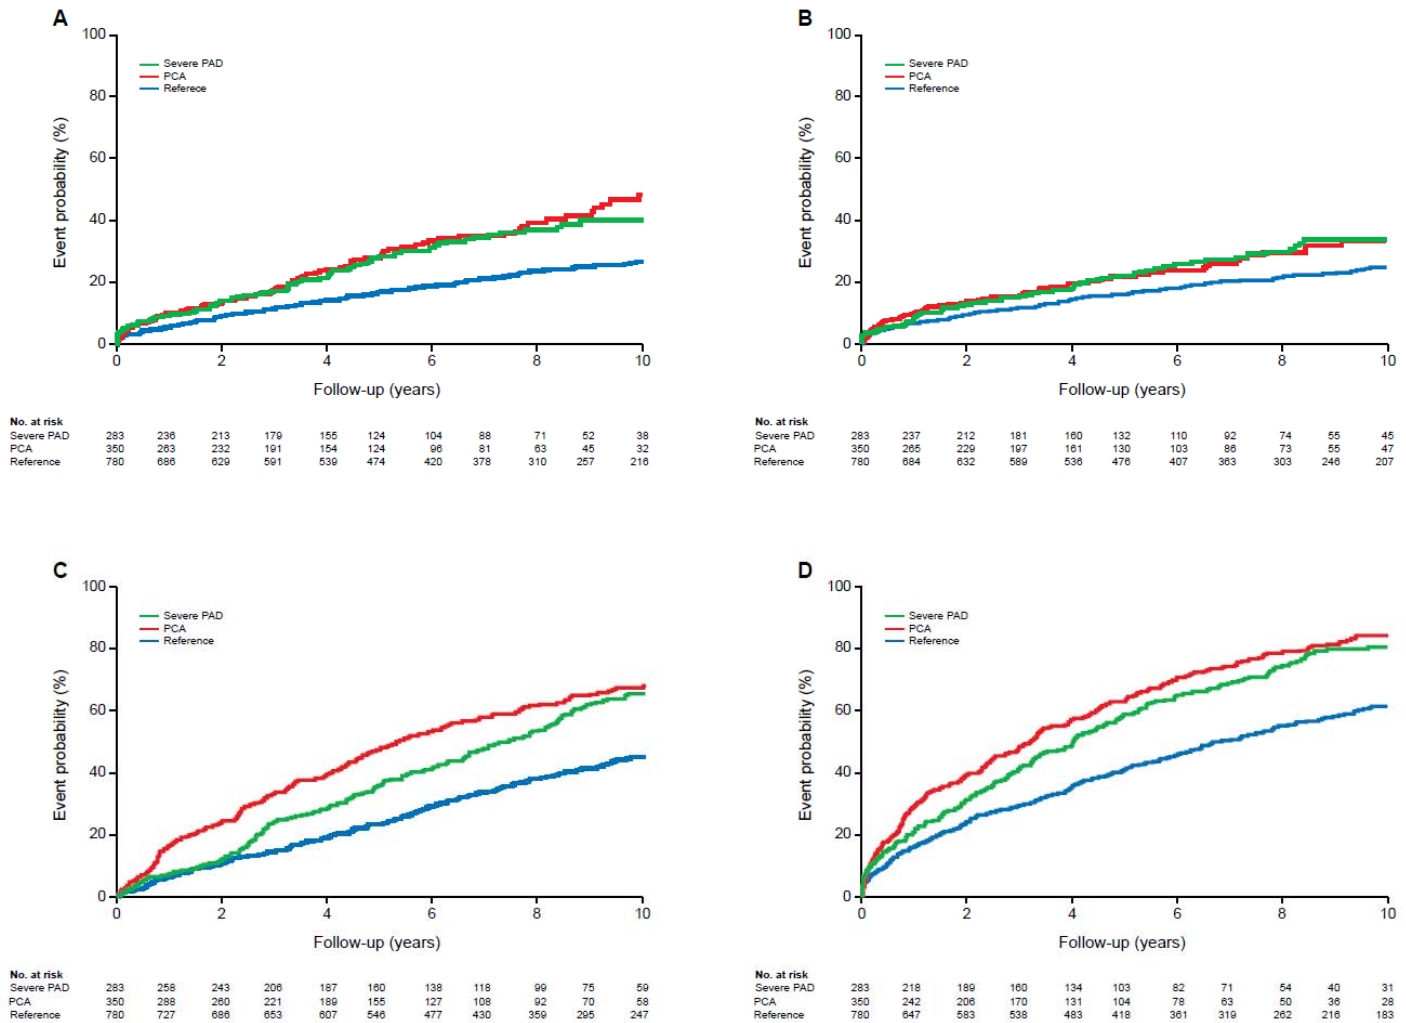

Legend: Patients with severe PAD and PCA had similar rates of myocardial infarction ( $p = 0.61$ ) and stroke ( $p = 0.81$ ) but PCA had a higher rate of death (HR = 1.28 (1.05-1.55),  $p = 0.01$ ) compared to severe PAD, after adjustment for age and sex. No = number; PAD = peripheral arterial disease; PCA = poorly compressible arteries; reference group = other ABI values.
